## RESEARCH ARTICLE

# High-throughput analysis reveals novel maternal germline RNAs crucial for primordial germ cell preservation and proper migration

Dawn A. Owens<sup>1</sup>, Amanda M. Butler<sup>1</sup>, Tristan H. Aguero<sup>1</sup>, Karen M. Newman<sup>1</sup>, Derek Van Booven<sup>2</sup> and Mary Lou King<sup>1,\*</sup>

**ABSTRACT**

During oogenesis, hundreds of maternal RNAs are selectively localized to the animal or vegetal pole, including determinants of somatic and germline fates. Although microarray analysis has identified localized determinants, it is not comprehensive and is limited to known transcripts. Here, we utilized high-throughput RNA-sequencing analysis to comprehensively interrogate animal and vegetal pole RNAs in the fully grown *Xenopus laevis* oocyte. We identified 411 (198 annotated) and 27 (15 annotated) enriched mRNAs at the vegetal and animal pole, respectively. Ninety were novel mRNAs over 4-fold enriched at the vegetal pole and six were over 10-fold enriched at the animal pole. Unlike mRNAs, microRNAs were not asymmetrically distributed. Whole-mount *in situ* hybridization confirmed that all 17 selected mRNAs were localized. Biological function and network analysis of vegetally enriched transcripts identified protein-modifying enzymes, receptors, ligands, RNA-binding proteins, transcription factors and co-factors with five defining hubs linking 47 genes in a network. Initial functional studies of maternal vegetally localized mRNAs show that *sox7* plays a novel and important role in primordial germ cell (PGC) development and that *ephrinB1* (*efnb1*) is required for proper PGC migration. We propose potential pathways operating at the vegetal pole that highlight where future investigations might be most fruitful.

**KEY WORDS:** *Xenopus*, RNA-seq, PGCs, Localized RNAs, Gene pathways, Scaffold

**INTRODUCTION**

For many organisms, oogenesis is a protracted affair during which RNAs and proteins are synthesized and stored for later use during embryogenesis. Patterning of the early *Xenopus* embryo is determined by these components and includes specification of the three axes (animal/vegetal, dorsal/ventral, left/right), the three primary germ layers, and the germ cell lineage (King, 2014). The animal/vegetal (A/V) axis is the first to be established and specifies where the three primary germ layers will arise in the embryo. Visible signs of A/V polarity are obvious in the stage I oocyte as the Balbiani body (BB) (or mitochondrial cloud) forms in close association with the nucleus and faces the future vegetal pole. The BB contains the maternal stockpile of mitochondria as well as the germline determinants embedded within germ plasm. Later in

oogenesis, the BB components accumulate at the vegetal pole, becoming tightly associated with the subcortical region.

The identity of the maternal RNAs and proteins that participate in embryonic patterning, and thus normal development, are of great interest. Initial screens selecting mRNAs enriched at either pole identified both somatic determinants, such as *vgl*, *vegT* and *wnt11*, and germ cell determinants including *nanos1*, *deadsouth*, *xdazl* and *xpat* (Mowry, 1996; King, 2014; Aguero et al., 2016). These mRNAs defined two patterns of RNA localization during oogenesis that appeared to align with their embryonic functions: BB-localized RNAs that function in germline identity (early pathway); and RNAs that are uniformly distributed in stage I but vegetally localized during stages II–IV (late pathway) and function in somatic patterning. However, as the number of known localized RNAs increased, some were found that used both the early and late pathways (*hermes*, *fatvg*), or used the late pathway but, after fertilization, were found only in the germ plasm (*dead-end*). Loss-of-function studies revealed that these RNAs indeed have multiple functions important to both somatic and germ cell lineages (Houston, 2013).

How the asymmetric distribution of maternal RNA controls embryonic patterning represents a key area of research in developmental biology. Recent microarray data using cortical RNAs as probes have identified several hundred transcripts at the vegetal pole and many fewer localized at the animal pole (Cuykendall and Houston, 2010). Although microarrays have identified transcripts localized to the vegetal cortex and to germ plasm, this type of analysis is limited in sensitivity and to known transcripts. A comprehensive analysis identifying the RNAs, both coding and non-coding, that are significantly enriched at either the animal or vegetal pole is an important first step towards understanding the maternal contribution to embryonic patterning.

In the present study, we utilized high-throughput RNA-sequencing (RNA-seq) analysis to interrogate both animal and vegetal pole localized RNAs in the fully grown oocyte. We identified 411 vegetally localized mRNAs and, of those, 198 are previously identified genes currently in the Xenbase database (Karpinka et al., 2015). Analysis of vegetally enriched transcripts identified receptors, ligands, RNA binding proteins, protein modifying enzymes and transcription factors, as well as defined gene hubs. Functional analysis of key genes confirmed their roles in primordial germ cell (PGC) development. We also identified eight microRNAs (miRNAs), all uniformly distributed, suggesting that early embryonic patterning is not regulated by localized maternal miRNAs but rather their localized mRNA targets. Analysis of non-coding RNAs must await further annotation of the *Xenopus tropicalis* or *laevis* genome. Here, we present a comprehensive analysis of identified RNAs found enriched at either the animal or vegetal pole. Our findings strongly support the vegetal pole as a major signaling center that patterns the early embryo.

<sup>1</sup>Department of Cell Biology, University of Miami Miller School of Medicine, 1011 NW 15th St, Miami, FL 33136, USA. <sup>2</sup>The Hussman Institute for Human Genomics, University of Miami Miller School of Medicine, 1011 NW 15th St, Miami, FL 33136, USA.

\*Author for correspondence (mking@med.miami.edu)

 M.L.K., 0000-0002-1923-4283

## RESULTS

## RNA-seq analysis of vegetal and animal poles

To identify transcripts localized at either the vegetal or animal pole, RNA was isolated from the respective poles (each comprising ~10-20% of total oocyte) of stage VI *X. laevis* oocytes and subjected to RNA-seq analysis. A total of six samples, comprising three vegetal and three oocyte-matched animal poles, were included in the analysis as described in Materials and Methods. The total number of reads for all three samples of vegetal and matched animal poles were virtually identical, revealing sample precision (Fig. 1A). The reads were aligned to the version 7.1 *X. laevis* genome (Xenbase.org) and principal component analysis (PCA) was performed on the normalized results. Two-dimensional PCA showed that transcripts identified in the vegetal pole samples cluster together and away from the animal pole samples, which also cluster together (Fig. 1B). The identified transcripts having an  $FDR < 0.05$  and an  $FPKM \geq 5$  were used to generate a scatter plot (Fig. 1C). The data support and extend previous analyses that show both a greater complexity and fold enrichment of RNAs at the vegetal pole in comparison to the animal pole (Cuykendall and Houston, 2010; De Domenico et al., 2015). As expected, mRNAs known to be localized at the vegetal pole (*nanos1*, *dazl*, *ddx25/deadsouth*) and animal pole [*dand5 (coco)* and *slc18a2 (vmat2)*] were identified as well as novel mRNAs. Over five thousand transcripts (5717) were found differentially expressed between the animal and vegetal poles based on a minimum q-value of 0.05 and 2-fold change.

Transcripts were considered significantly enriched at the vegetal pole if they had at least a 4-fold increase compared with the animal pole. The stringent criteria set yielded a total of 411 vegetally enriched transcripts, 198 of which were annotated (Fig. 1D, Table S1). Of the 198 transcripts identified, 38 have been shown to be vegetally localized, with 23 of them being specifically associated with germ plasm (Cuykendall and Houston, 2010; Claussen et al., 2015; De Domenico et al., 2015). Transcripts were considered localized at the animal pole if they were at least 10-fold enriched compared with the vegetal pole. Under these conditions, 27, including 15 annotated, mRNAs were enriched at the animal pole (Fig. 1D). All annotated and unannotated transcripts can be found in Tables S2 and S3, respectively.

## Biological process and network analysis of vegetally enriched transcripts

To identify possible gene functions, the 198 annotated vegetal mRNAs were manually data mined using GeneCards ([www.genecards.org](http://www.genecards.org)). Table 1 shows the 40 most enriched transcripts in the vegetal pole. Ten categories were established based on function (Fig. 2A). The top six categories were: signal transduction (26%), transport (13%), transcription (7%), cytoskeletal related (8%), the ubiquitin pathway (7%) and cell cycle (7%). Enzymes are often key players in regulating gene pathways; therefore, we also identified and categorized the enzymes represented in our vegetally enriched data set. Enzymes represent 60/198 (30%) of localized transcripts. Nine categories of enzymes were identified, with kinases (18%),

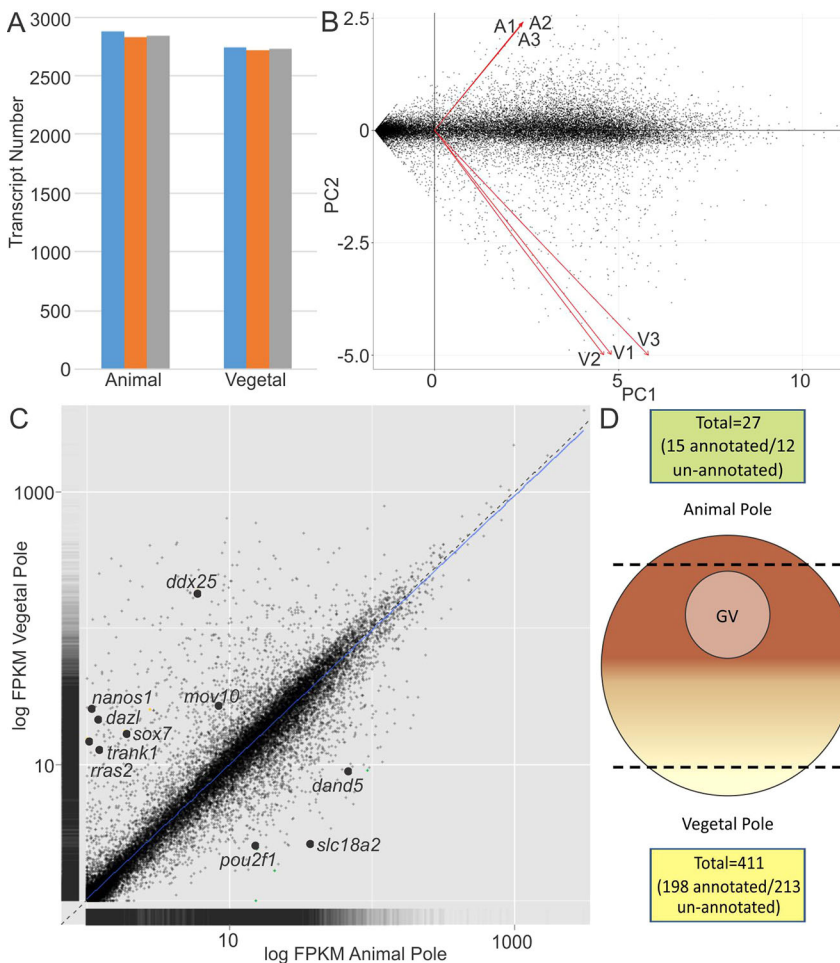

**Fig. 1. RNA-seq analysis of vegetal versus animal pole transcripts in stage VI *X. laevis* oocytes.** (A) Total read counts for oocyte-paired vegetal and animal pole samples. Bars of the same color represent vegetal ( $n=3$ ) and animal ( $n=3$ ) pole samples extracted from the same oocytes. (B) Two-dimensional principal component analysis of vegetal and animal pole transcripts. Vectors V1, V2, V3 and A1, A2, A3 represent vegetal and animal pole samples, respectively. (C) Scatter plot comparing vegetal and animal pole transcripts. (D) Differential expression analysis of vegetal versus animal pole transcripts with  $FDR \leq 0.05$  and  $FPKM \geq 5$ . GV, germinal vesicle.

metabolism related (17%), ubiquitin pathway (13%) and ATPases/GTPases (12%) making up the majority (Fig. 2B).

Vegetally localized mRNAs were subject to gene pathway and network analysis by GeneGo. Significantly related gene ontology (GO) processes were grouped into seven categories based on gene expression (Table 2). Consistent with a role in embryonic patterning, these categories included: developmental processes, signaling regulation, localization, phosphate metabolic processes, cellular protein metabolic processes, cell cycle, and gamete generation. Interestingly, genes involved in neurogenic processes such as neuroblast proliferation, including *fgfr2*, *frizzled1* and *ephrinB1* (*efnb1*), were well represented in our data set, composing 12% of annotated genes (Table 2).

We next investigated potential gene networks present within the 198 vegetally enriched transcripts. Using MetaCore analysis (GeneGo), we identified 47 genes that form a direct interaction network (Fig. 2C). These genes encode protein-modifying enzymes [*caspase 3* (*cas3*), *cathepsin C* (*ctsc*), *psck6/pace4*, *tesk1/2*, *senp1*], receptors [*fgfr2*, *frizzled1* (*fd1*), *a2mr/lrp1*], ligands (*wnt11*), and five key transcription factors or co-factors (*e2f1*, *irf8*, *err1/esrra*, *p300/ep300* and *sox7*), the first four of which represent network hubs. These mRNAs were validated as vegetally localized by either RT-qPCR (Fig. 2D) or WISH (Fig. 3). Published studies on these factors suggest their involvement in regulating the cell cycle (*e2f1*), endoderm specification (*sox7*), metabolic pathways (*err1*) and lineage commitment (*irf8*) (Costa et al., 2013; Johansen et al., 2016; Minderman et al., 2016; Stovall et al., 2014).

#### miRNA target RNAs are localized at the vegetal pole

Germ plasm RNAs must be post-transcriptionally regulated for germline survival (Lai et al., 2012; reviewed by Lai and King, 2013). RNA degradation within germ plasm may be regulated by miRNAs (Bartel, 2004; Yamaguchi et al., 2014). Therefore, we mined our data to identify vegetally localized miRNAs. Our analysis identified only eight miRNAs that were expressed in both the vegetal and animal poles: *15c*, *18a*, *19b*, *20a*, *92a*, *363*, *427* and *429*. Surprisingly, none was significantly enriched at either pole (data not shown).

We next determined if the predicted mRNA targets of the eight identified miRNAs were vegetally localized. Interestingly, predicted targets of 7/8 miRNAs are enriched in the vegetal pole (Table 3). In total, 13 vegetally localized target mRNAs (listed in Table 3) were identified that contain at least one recognition sequence conserved between *X. tropicalis* and human for their respective miRNAs. These results suggest that if early embryonic patterning is regulated by miRNA activity, it is not by localizing miRNAs to the vegetal pole but rather by targeting specific vegetally localized RNAs.

#### Expression of vegetally localized RNAs during development

We chose 17 transcripts (*xpat*, *efnb1*, *rras2*, *mov10*, *otx1*, *sox7*, *spire1*, *wnk2*, *e2f1*, *sybu*, *atrx*, *hook2*, *tb2*, *rnf38*, *trank1*, *wwtr1* and *parn*) for WISH analysis to determine their expression pattern during embryogenesis (Fig. 3, Fig. S1A,B). Consistent with our RNA-seq data, 15/17 were expressed exclusively in the vegetal pole of stage IV oocytes (Fig. 3, Fig. S1A). Not surprisingly, the two low expressing mRNAs, *parn* and *wwtr1* (only 5- to 6.7-fold enriched compared with the animal pole) were not detected in stage IV oocytes but were detected later at blastula stage (Fig. S1B). Recently, another group analyzed transcript localization in the 8-cell *X. tropicalis* embryo by RNA-seq (De Domenico et al., 2015). Comparison of the vegetal/

animal blastomeres revealed that 27 of our filtered 198 transcripts remain vegetally enriched after both fertilization and cortical rotation have occurred (De Domenico et al., 2015).

Spatial expression patterns were examined during oogenesis, the pre-midblastula transition (MBT), gastrula, neurula, and tailbud stages to determine whether localized mRNAs contribute to the future germline, soma, or both lineages. During oogenesis, three mRNA localization patterns were detected: the early or METRO pathway (Fig. 3A), the late Vg1-like pathway [Fig. 3B, Fig. S1A (*atrx*, *hook2*, *tb2*), Fig. S1B], or both [Fig. 3C, Fig. S1A (*rnf38*)] (King et al., 1999). Germ plasm-specific *xpat* served as a marker for germline expression (Hudson and Woodland, 1998). Regardless of the pathway used, all mRNAs were subsequently found in the germ plasm of embryos as well as in the soma (Fig. 3, Fig. S1A,B). 12/17 RNAs represented novel germline components, while *xpat*, *sybu*, *otx1*, *tb2* and *efnb1* were confirmed as previously described (Cuykendall and Houston, 2010; De Domenico et al., 2015).

Except for *sox7* and *efnb1*, germ plasm expression persisted through neurula (Fig. 3, Fig. S1A,B). During gastrulation, the germline segregates from endoderm and PGCs form a distinct lineage. By neurula, PGCs are transcriptionally active for the first time (Venkatarama et al., 2010). *sox7* is expressed through gastrula stages but is lost by neurula suggesting an early role in PGC development. *efnb1* is not expressed at gastrula but is re-expressed by neurula, probably as part of a new gene expression program in PGCs. PGC migration towards the dorsal mesentery and organogenesis occur at the early tailbud stage. Only 41% (7/17) of the vegetal transcripts, including *xpat*, remained expressed in PGCs during tailbud stage (Fig. 3). These transcripts included transcription factors (*otx1*, *e2f1*), RISC factor (*mov10*), actin regulator (*spire1*), Ser/Thr kinase (*wnk2*), and an adaptor protein that binds kinesin (*sybu*). They are likely to be zygotic transcripts and might play roles in migration and/or in preserving PGC totipotency.

In addition to PGC expression, 71% (12/17) are also expressed in the eye anlage and the future posterior region in neurula, including the somitogenic mesoderm (Fig. 3, Fig. S1A,B). In tailbud stages the most notable expression pattern was in neural regions including the eye, cranial ganglia, neural tube, nasal placodes, brain, otic vesicle and the intersegmental region between the somites. Vegetally enriched transcripts that have previously been shown to be involved in neural pathways included *efnb1*, *sybu*, *wnk2* and *otx1* (Colozza and De Robertis, 2014; Bovolenta et al., 2006; Rinehart et al., 2011; Zhang et al., 2015). Taken together, these data suggest that genes enriched at the vegetal pole of *Xenopus* oocytes contribute to both germline and neural specification during development.

#### Novel mRNAs enriched at the animal pole

We identified 15 mRNAs, six not previously reported, that were at least ten-fold enriched at the animal pole (Table 4). These mRNAs represent the following functional categories: signaling [*dand5*, *ifrd2*, *slc18a2*, *spata13*, *acaca*, *tmem192*, *ssr1*, *prr11*], gene expression (*pou2f1*), cell division (*rmdn3*) and metabolism (*adpgk*, *prrg4*, *prkag1*). Two mRNAs previously shown to be enriched at the animal pole were chosen for validation by WISH: *slc18a2* and *dand5* (Fig. S1C). *dand5* is a TGF $\beta$  and Wnt antagonist (Eimon and Harland, 2001; Bates et al., 2013). Slc18a2 transports monoamines into secretory vesicles for eventual exocytosis (Nikishin et al., 2012). As expected, both animal pole transcripts were expressed exclusively in the animal pole of pre-MBT embryos (Fig. S1C). Animal pole transcripts are expressed primarily in the

**Table 1. Gene function of the 40 most highly enriched mRNAs identified at the oocyte vegetal pole**

| Gene ID                    | Gene name                                                | JGI               | Unigene   | Fold change (V/A) | Protein function or functional feature                       |
|----------------------------|----------------------------------------------------------|-------------------|-----------|-------------------|--------------------------------------------------------------|
| <i>grip2*</i>              | Glutamate receptor interacting protein 2                 | Xelaev16034487m.g | XI.64243  | 656.02            | Scaffold protein with PDZ domain                             |
| <i>nanos1</i>              | Nanos homolog 1                                          | Xelaev16026544m.g | XI.1145   | 391.89            | RNA binding                                                  |
| <i>rras2<sup>‡</sup></i>   | Related RAS viral (r-ras) oncogene homolog 2             | Xelaev16056461m.g | XI.47312  | 360.11            | Ras-related GTPase                                           |
| <i>kif13b*</i>             | Kinesin family member 13B                                | Xelaev16027627m.g | XI.55605  | 267.80            | Kinesin-like protein                                         |
| <i>pat</i>                 | PGC-associated transcript protein                        | Xelaev16012806m.g | XI.38     | 226.17            | Germ plasm formation, positioning and maintenance            |
| <i>dazl</i>                | Deleted in azoospermia-like                              | Xelaev16047101m.g | XI.311    | 217.44            | RNA binding                                                  |
| <i>sybu*</i>               | Syntabulin (syntaxin-interacting)                        | Xelaev16066812m.g | XI.8441   | 175.30            | Nucleolar GTPase/ATPase p130                                 |
| <i>rtn3-a</i>              | Reticulon 3                                              | Xelaev16042166m.g | XI.57382  | 162.84            | Reticulon                                                    |
| <i>trank1<sup>‡</sup></i>  | Tetratricopeptide repeat and ankyrin repeat containing 1 | Xelaev16058483m.g | NA        | 154.58            | Translocase of outer mitochondrial membrane complex          |
| <i>germes</i>              | RNA binding protein with multiple splicing               | Xelaev16035521m.g | XI.17472  | 141.43            | Nucleic acid binding                                         |
| <i>wnt11b</i>              | Wingless-type MMTV integration site family, member 11B   | Xelaev16048139m.g | XI.24008  | 139.89            | Secreted growth factor/developmental regulator               |
| <i>trim36*</i>             | Tripartite motif containing 36                           | Xelaev16048562m.g | XI.6926   | 127.93            | Zinc finger, B-box                                           |
| <i>farp2</i>               | FERM, RhoGEF and pleckstrin domain protein 2             | Xelaev16049032m.g | XI.53782  | 111.93            | Rho guanine nucleotide exchange factor that activates RAC1   |
| <i>cnppd1</i>              | Cyclin Pas1/PHO80 domain containing 1                    | Xelaev16027858m.g | XI.7190   | 93.24             | Cyclin                                                       |
| <i>slain1<sup>‡</sup></i>  | SLAIN motif family, member 1                             | Xelaev16028782m.g | NA        | 89.96             | Microtubule plus-end tracking protein                        |
| <i>srgap1<sup>‡</sup></i>  | SLIT-ROBO Rho GTPase activating protein 1                | Xelaev16070447m.g | NA        | 78.71             | CDC42- and RhoA-interacting protein CIP4                     |
| <i>ddx25</i>               | DEAD (Asp-Glu-Ala-Asp) box helicase 25                   | Xelaev16075440m.g | XI.670    | 75.17             | ATP-dependent RNA helicase                                   |
| <i>pcsk6</i>               | Proprotein convertase subtilisin/kexin type 6            | Xelaev16063723m.g | XI.48635  | 71.99             | protease, proprotein convertase                              |
| <i>gk</i>                  | Glycerol kinase                                          | Xelaev16073000m.g | XI.17142  | 71.20             | Ribulose kinase and related carbohydrate kinases             |
| <i>acs11</i>               | Acyl-CoA synthetase long-chain family member 1 protein   | Xelaev16052290m.g | XI.15591  | 52.76             | Fatty acid CoA ligase                                        |
| <i>slc12a9</i>             | Solute carrier family 12, member 9                       | Xelaev16065485m.g | XI.59798  | 52.58             | Amino acid transporter                                       |
| <i>wnk2</i>                | WNK lysine deficient protein kinase 2                    | Xelaev16065595m.g | XI.50299  | 51.69             | Serine/threonine protein kinase                              |
| <i>vegt*</i>               | Vegt protein                                             | Xelaev16018006m.g | XI.1775   | 51.34             | T-box transcription factor, meso-endodermal determinant      |
| <i>cdr2f<sup>‡</sup></i>   | Cerebellar degeneration-related protein 2-like           | Xelaev16042542m.g | XI.9895   | 50.48             | Myosin class II heavy chain                                  |
| <i>tesk2<sup>‡</sup></i>   | Testis-specific kinase 2                                 | Xelaev16001025m.g | XI.171668 | 46.74             | Endosomal membrane proteins, serine/threonine protein kinase |
| <i>cdk5r2</i>              | Cyclin-dependent kinase 5, regulatory subunit 2 (p39)    | Xelaev16007720m.g | XI.31022  | 46.60             | CDK5 kinase activator                                        |
| <i>otx1</i>                | Orthodenticle homeobox 1                                 | Xelaev16005310m.g | XI.781    | 46.51             | Homeodomain transcription factor                             |
| <i>rhobtb2<sup>‡</sup></i> | Rho-related BTB domain containing 2                      | Xelaev16065046m.g | XI.12379  | 45.82             | Ras-related small GTPase                                     |
| <i>tmem65</i>              | Transmembrane protein 65                                 | Xelaev16028617m.g | XI.55768  | 45.36             | Uncharacterized conserved protein                            |
| <i>mov10</i>               | Mov10 RISC complex RNA helicase                          | Xelaev16074505m.g | XI.52320  | 45.22             | RNA helicase                                                 |
| <i>trib1</i>               | Tribbles pseudokinase 1                                  | Xelaev16002738m.g | XI.75411  | 44.66             | Serine/threonine protein kinase                              |
| <i>ppp1r2</i>              | Protein phosphatase 1, regulatory (inhibitor) subunit 2  | Xelaev16041705m.g | XI.52180  | 44.20             | Protein phosphatase 1, regulatory (inhibitor) subunit PPP1R2 |
| <i>sox7</i>                | SRY (sex determining region Y)-box 7                     | Xelaev16000442m.g | XI.1241   | 42.25             | HMG-box transcription factor                                 |
| <i>ldlrp1-b</i>            | Low density lipoprotein receptor adaptor protein 1       | Xelaev16018841m.g | XI.8355   | 40.88             | Adaptor protein of polarized cells, contains PTB domain      |
| <i>paqr6<sup>‡</sup></i>   | Progestin and adipoQ receptor family member VI           | Xelaev16007491m.g | XI.57243  | 39.20             | Predicted membrane proteins, contain hemolysin III domain    |
| <i>sf3a1<sup>‡</sup></i>   | Splicing factor 3a, subunit 1, 120 kDa                   | Xelaev16054742m.g | XI.34155  | 37.67             | Required for pre-mRNA splicing                               |
| <i>dnd1</i>                | DND microRNA-mediated repression inhibitor 1             | Xelaev16016713m.g | XI.29785  | 37.50             | Nuclear ribonucleoprotein R (RRM superfamily)                |

Continued

Table 1. Continued

| Gene ID        | Gene name                                     | JGI               | Unigene | Fold change (V/A) | Protein function or functional feature                                                                                                                        |
|----------------|-----------------------------------------------|-------------------|---------|-------------------|---------------------------------------------------------------------------------------------------------------------------------------------------------------|
| <i>fam168b</i> | Family with sequence similarity 168, member B | Xelaev16019587m.g | XI.3240 | 36.47             | RNA polymerase II, large subunit                                                                                                                              |
| <i>hook2</i>   | Hook microtubule-tethering protein 2          | Xelaev16057970m.g | XI.9790 | 34.05             | Uncharacterized coiled-coil protein                                                                                                                           |
| <i>bicc1</i>   | BicC family RNA binding protein 1             | Xelaev16022482m.g | XI.641  | 25.70             | Putative RNA-binding protein; acts as a negative regulator of Wnt signaling; and might be involved in regulating gene expression during embryonic development |

GeneCards was used to indicate gene functions. †Nine novel mRNAs enriched at the vegetal pole and associated with germ plasm are identified. \*The highest expressing isoform was used when multiple isoforms were identified. V/A, vegetal/animal.

neural ectoderm at later developmental stages, as previously described (Fig. S1C) (Grant et al., 2014). MetaCore (GeneGo) direct interaction pathway analysis did not reveal integrated networks among the animal pole-enriched RNAs.

### Overexpression of *e2f1*, *otx1*, *parn*, *rras2* and *wvtr1* significantly reduces PGC number

As a first step towards functional analysis, six vegetally enriched transcripts expressed in PGCs were selected for overexpression studies. One-cell embryos were injected in the vegetal region with *in vitro* synthesized mRNA of selected transcripts or GFP. Tailbud embryos were collected and the number of PGCs per embryo was calculated and compared with GFP-injected controls.

Overexpression of the transcription factors *e2f1* and *otx1*, the transcriptional co-activator *wvtr1*, a Ras-like small GTPase *rras2*, and the poly(A)-specific ribonuclease *parn* significantly reduced PGC number, whereas *spire1* had no effect (Fig. 4). Importantly, aside from the effects on PGC number, embryos appeared normal. Taken together, these results suggest a specific role in PGC development for *otx1*, *e2f1*, *wvtr1*, *rras2* and *parn*.

### Embryos depleted of *otx1* and *wvtr1* are deficient in PGCs

To further test the function of *otx1* and *wvtr1*, we created loss-of-function morphants by injection of antisense morpholinos (MOs) into one-cell embryos. Both *otx1*-MO and *wvtr1*-MO blocked the translation of their respective proteins in a dose-dependent fashion

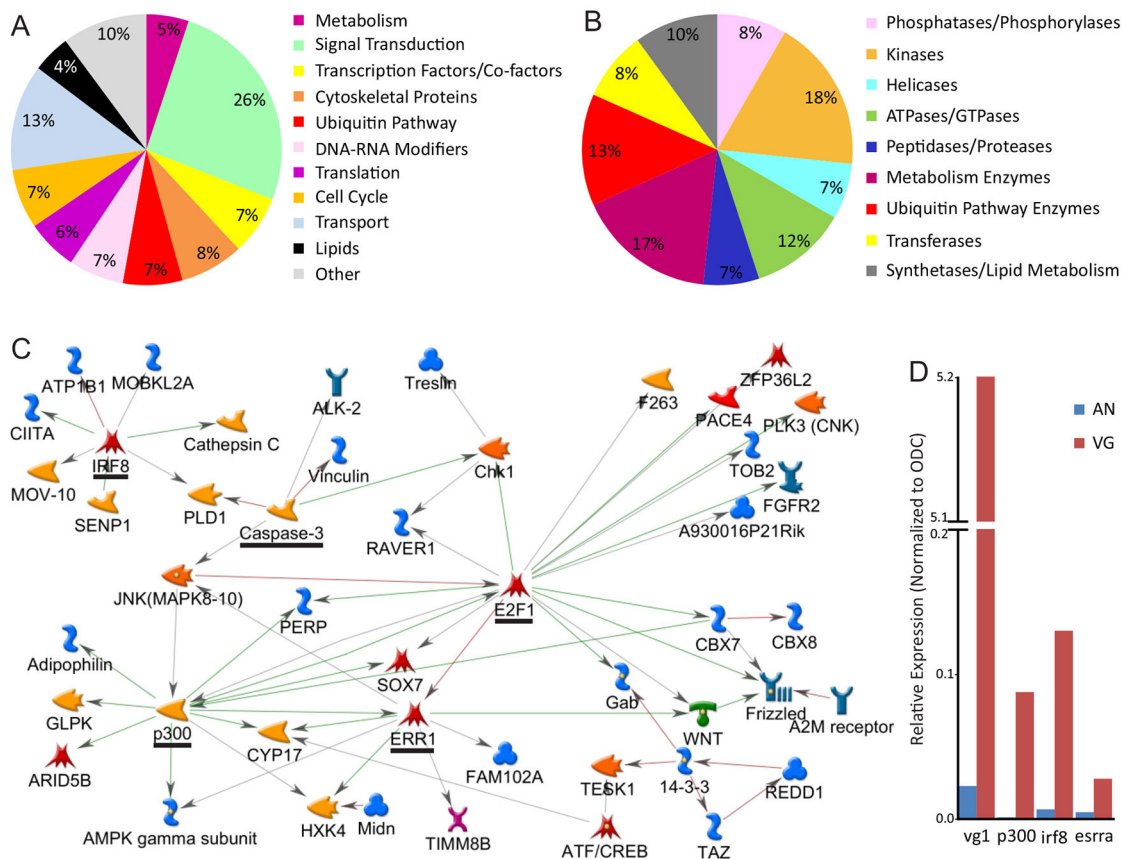

**Fig. 2. Biological process and network analysis of vegetally enriched transcripts.** (A) The 198 annotated transcripts upregulated in the vegetal pole categorized according to their biological function (GeneCards). (B) Sixty vegetally enriched transcripts with enzymatic activity grouped based on enzymatic function. (C) GeneGo pathway analysis using the direct interaction algorithm of vegetally enriched transcripts. (D) RT-qPCR verification of pathway hubs *p300*, *irf8* and *err1/esrra* at animal (An) versus vegetal (Vg) poles. *vg1*, control for vegetal pole.

**Table 2. GO processes of vegetally enriched transcripts**

| GeneGo process                                                   | P-value  | FDR      | No. of genes |
|------------------------------------------------------------------|----------|----------|--------------|
| <b>Developmental process</b>                                     | 3.42E-05 | 3.28E-03 | <b>78</b>    |
| Cell development                                                 | 2.58E-04 | 9.42E-03 | 32           |
| Neurotrophin signaling pathway                                   | 2.38E-03 | 3.71E-02 | 9            |
| Neuroblast proliferation                                         | 3.23E-03 | 4.56E-02 | 3            |
| <b>Regulation of signaling</b>                                   | 9.13E-06 | 1.61E-03 | <b>50</b>    |
| Intracellular signal transduction                                | 3.02E-08 | 9.56E-05 | 40           |
| Transmembrane receptor protein tyrosine kinase signaling pathway | 1.09E-04 | 6.11E-03 | 17           |
| Signal transduction by p53 class mediator                        | 1.83E-03 | 3.14E-02 | 6            |
| <b>Regulation of localization</b>                                | 2.80E-06 | 9.85E-04 | <b>42</b>    |
| Regulation of protein localization                               | 4.15E-06 | 1.31E-03 | 19           |
| Regulation of intracellular transport                            | 7.49E-06 | 1.48E-03 | 16           |
| <b>Regulation of phosphate metabolic process</b>                 | 1.37E-05 | 2.18E-03 | <b>38</b>    |
| Regulation of phosphorylation                                    | 6.16E-05 | 4.55E-03 | 28           |
| Regulation of protein serine/threonine kinase activity           | 2.07E-04 | 8.71E-03 | 14           |
| <b>Regulation of cellular protein metabolic process</b>          | 5.22E-07 | 4.08E-04 | <b>38</b>    |
| Lipid transport                                                  | 7.32E-05 | 5.15E-03 | 10           |
| Positive regulation of deacetylase activity                      | 8.68E-05 | 5.39E-03 | 3            |
| <b>Regulation of cell cycle</b>                                  | 7.08E-06 | 1.48E-03 | <b>24</b>    |
| Negative regulation of cell cycle                                | 1.61E-06 | 6.37E-04 | 14           |
| Negative regulation of nuclear division                          | 2.88E-05 | 3.06E-03 | 6            |
| Cell cycle checkpoint                                            | 2.08E-03 | 3.37E-02 | 8            |
| <b>Gamete generation</b>                                         | 6.10E-05 | 4.55E-03 | <b>19</b>    |
| Sexual reproduction                                              | 1.04E-04 | 6.00E-03 | 21           |
| Female gamete generation                                         | 2.73E-04 | 9.75E-03 | 7            |
| Spermatogenesis                                                  | 1.10E-03 | 2.35E-02 | 14           |
| Multicellular organismal reproductive process                    | 1.70E-04 | 7.97E-03 | 22           |

All 198 vegetally localized genes were subject to GeneGo analysis. GO processes are categorized based on the greatest number of enriched transcripts identified. Seven primary categories are in bold.

(Fig. S2B). Injected embryos were collected at tailbud stages and the number of PGCs per embryo was calculated and compared with the control. Inhibition of *otx1* and *wnt1* significantly increased PGC number (Fig. 5).

### Misexpression of *sox7* reduces PGC number

The transcription factor *sox7* has been shown to play various roles in embryonic development, including proliferation, differentiation, hematopoiesis, cardiogenesis and vasculogenesis (Stovall et al., 2014). However, its role in PGCs is unknown. *sox7* expression is significantly upregulated in the vegetal compared with the animal pole in stage VI oocytes (Fig. 1C, Table 1) and its expression persisted in PGCs during gastrulation (Fig. 3B). To assess the role of *sox7* in PGC development, fertilized embryos were injected vegetally with either a *sox7*-targeted MO (Fig. S3) or the dominant-negative transcript *sox7dCEnR* (Fig. 6). Overexpression and rescue experiments were performed using *X. tropicalis sox7* (*Xtsox7*) mRNA (Zhang et al., 2005a). Initial injections of *sox7dCEnR* or *Xtsox7* mRNAs were performed at various concentrations to determine an effective dose that would not cause the phenotypic alterations observed by Zhang et al. (2005a) (data not shown). No notable changes in morphology were observed in embryos injected with *sox7*-MO, *sox7dCEnR* (200 pg) and/or *Xtsox7* (200 pg) mRNA (Fig. 6A–D, Fig. S3C,D). The number of PGCs per embryo was calculated and compared with

uninjected controls. Both dominant-negative and MO-mediated inhibition and the overexpression of *Xtsox7* significantly reduced the number of PGCs in tailbud embryos (Fig. 6, Fig. S3). Expression of both *sox7dCEnR* and *Xtsox7* mRNAs together significantly rescued the effect that *sox7dCEnR* had on PGC number, presumably because *Xtsox7* restored function (Fig. 6D,E). These data suggest that the level of *sox7* expression must be tightly regulated for proper PGC development.

### *efnb1* plays an essential role in PGC specification and migration

Eph receptor tyrosine kinases and their ligands, ephrins, have been shown to be involved in the formation of tissue boundaries, including separation of the germ layers, by regulating migration, adhesion and repulsion during embryonic development (Rohani et al., 2014). However, their specific role(s) in germline development is unknown. Interestingly, *efnb1* expression is upregulated in vegetal versus animal poles of stage VI oocytes. *efnb1* is also expressed in PGCs at neurula (Fig. 3A), suggesting a role in this lineage. To assess the role of *efnb1* in PGC development, *efnb1* was overexpressed by injecting flag-tagged *efnb1* (*efnb1*-FL) mRNA into the vegetal region of fertilized embryos. No notable changes in morphology or PGC location were observed (Fig. 7A). However, overexpression of *efnb1* significantly reduced the number of PGCs compared with control (Fig. 7A). This effect is rescued by co-injection with *efnb1*-MO (Fig. 7A). These data suggest that PGC number is not maintained within an environment of excess Efnb1 protein.

We next assessed the effect of *efnb1* inhibition using an *efnb1*-MO as described (Moore et al., 2004). No notable changes in morphology or PGC number were observed in embryos injected with *efnb1*-MO compared with scrambled-MO or uninjected controls (Fig. 7B). *efnb1* inhibition significantly increased the total number of embryos containing mislocalized PGCs according to the boundaries designated for normal PGC localization, between somites 5 and 11, as described by Tarbashevich et al. (2011). Mislocalization was along the anterior/posterior (A/P) axis, primarily beyond the normal posterior boundary (Fig. 7B). PGC mislocalization was rescued by co-expression with an *efnb1* mRNA construct containing conservative mutations in the MO-binding region (*efnb1*-FL-rescue), rendering the MO ineffective (data not shown), confirming the specificity of the effect of *efnb1*-MO (Fig. 7B). These data suggest that *efnb1* is essential for the proper migration of PGCs.

### *p300* is required for normal PGC development

The transcriptional co-activator and histone acetyltransferase *p300* has been shown to be expressed during oogenesis (Kwok et al., 2006) and to regulate the metabolic state of mammalian germ cells (Boussouar et al., 2014). *p300* is enriched at the vegetal pole of stage VI oocytes (Fig. 2D) and represents one of the network hubs at the vegetal pole (Fig. 2C). We therefore examined whether *p300* plays a role in *Xenopus* PGC development. Fertilized embryos were incubated with DMSO (control) or the *p300* small molecule inhibitor C646 until they reached tailbud stages. Treated embryos were then collected, and the number of PGCs per embryo was calculated and compared with controls. Inhibition of *p300* significantly reduced PGC number in a dose-dependent manner, suggesting a role in PGC development (Fig. 8).

### DISCUSSION

Here we report the first interrogation of RNAs within the vegetal and animal poles by RNA-seq. WISH revealed all 17 selected mRNAs

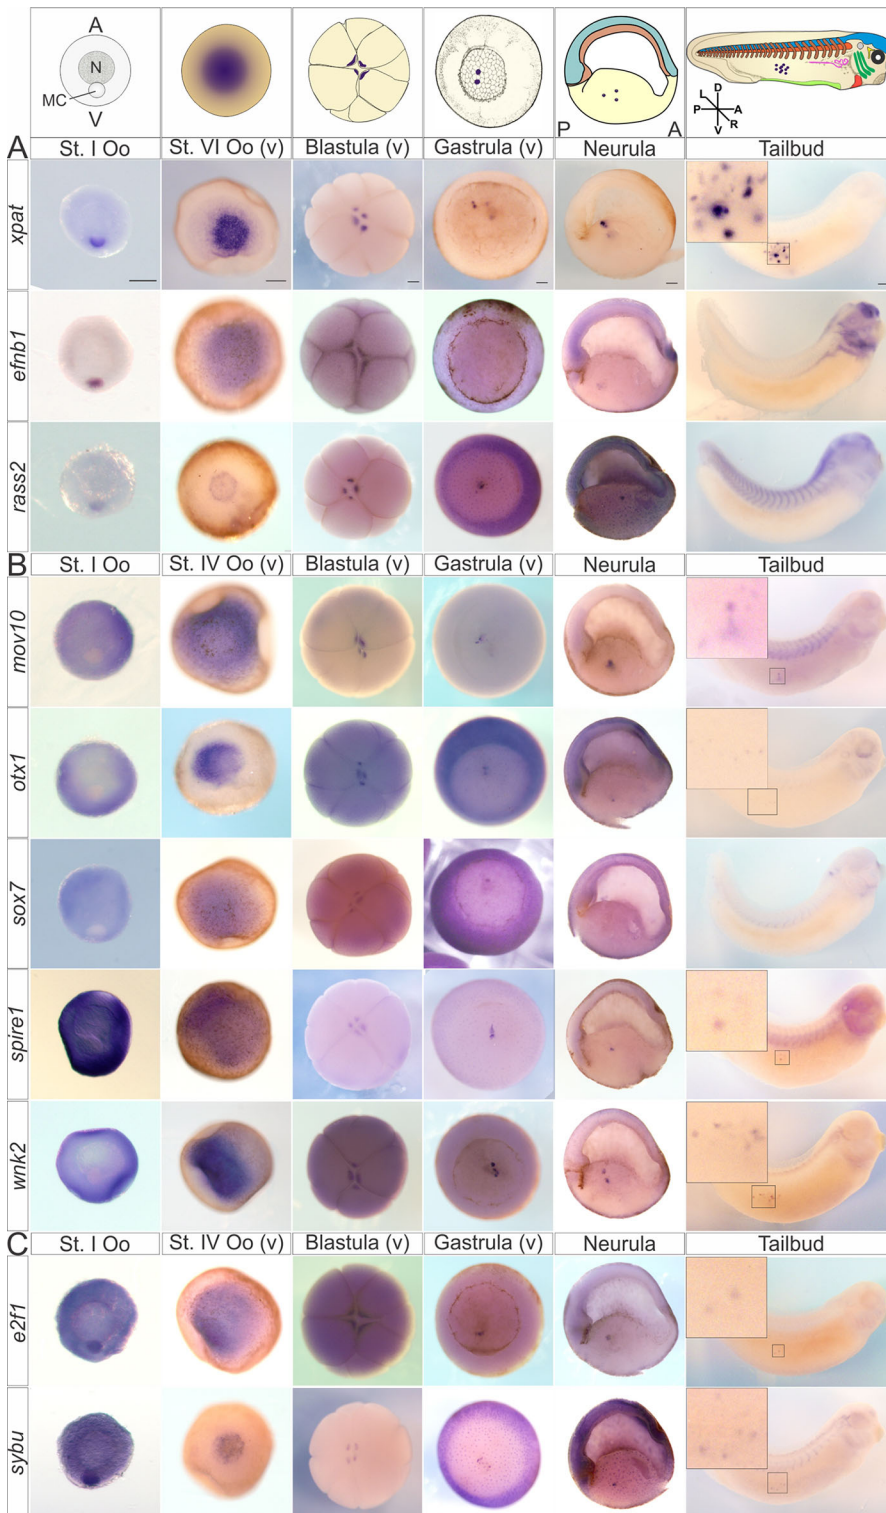

**Fig. 3. WISH of vegetal pole transcripts.** The expression of a subset of vegetally enriched mRNAs was analyzed during oogenesis and embryo development by WISH. Expression patterns are grouped according to mRNA pathway: early (A), late (B) or both (C). *xpat* expression marks germ plasm. Probes, developmental stages and developmental structures are indicated in the illustrations at the top: germ plasm/PGCs (purple), pronephros (pink), ventral blood islands (lime green), eye (black), lens (white), otic vesicle (gray), cranial ganglia (yellow), brachial arches (green), nasal placodes (teal), intersegmental region (brown), notochord (orange), brain and neural tube (blue). Transcripts detected in PGCs at the tailbud stage are shown at higher magnification in insets. WISH analysis was performed on  $\geq 40$  total embryos from at least two adult female frogs. Dorsal (D), ventral (V), left (L), right (R), posterior (P), anterior (A), vegetal view (v); MC, mitochondrial cloud; N, nucleus; Oo, oocyte. Scale bars: 100  $\mu\text{m}$  for stage I oocyte; 200  $\mu\text{m}$  in remaining panels.

to be localized, providing strong support for the accuracy of the data sets. Our findings underscore the dramatic transcript asymmetry along the A/V axis and the importance of the vegetal pole in initiating somatic and germline lineages in the early embryo. Importantly, as the annotation of the *Xenopus* genome improves, our data set can be continually mined to identify spliced variants and currently unknown transcripts.

Six important observations have emerged from our studies. (1) We identified 90 novel mRNAs that were over 4-fold enriched at

the vegetal pole and six that were over 10-fold enriched at the animal pole. (2) GeneGo analysis revealed a network encompassing over 20% of the annotated vegetally enriched mRNAs, indicating great connectivity of gene function and localization. Transcription factors/co-factors *e2f1*, *irf8*, *err1* and *p300* defined four regulatory hubs for future analysis (Fig. 2C). (3) Unlike mRNAs, localization of maternal miRNAs does not appear to be a strategy employed to regulate gene expression along the A/V axis. (4) Enzymes represented 30% of the 198 enriched annotated mRNAs,

**Table 3. miRNAs and their vegetally localized mRNA targets**

| Gene          | FPKM | Fold change (V/A) | Refseq         | Gene name                                             | miRNAs |     |     |     |     |     |     |
|---------------|------|-------------------|----------------|-------------------------------------------------------|--------|-----|-----|-----|-----|-----|-----|
|               |      |                   |                |                                                       | 15c    | 19b | 20a | 363 | 427 | 429 | 92a |
| <i>srgap1</i> | 28   | 57.3              | NM_020762      | SLIT-ROBO Rho GTPase activating protein 1             |        |     | x   |     | x   | x   |     |
| <i>rf38</i>   | 351  | 28.0              | NM_022781      | Ring finger protein 38                                |        | x   | x   | x   | x   |     | x   |
| <i>sulf1</i>  | 198  | 26.6              | NM_001128204   | Sulfatase 1                                           |        | x   | x   |     | x   |     |     |
| <i>pgam1</i>  | 420  | 20.6              | NM_002629      | Phosphoglycerate mutase 1 (brain)                     |        |     |     | x   |     |     | x   |
| <i>fn3a</i>   | 102  | 18.2              | NM_001079673   | Fibronectin type III domain containing 3A             |        | x   | x   |     | x   |     |     |
| <i>tesk2</i>  | 52   | 15.6              | NM_007170      | Testis-specific kinase 2                              |        | x   |     |     |     |     |     |
| <i>chek1</i>  | 219  | 14.7              | NM_001114121.2 | Checkpoint kinase 1                                   | x      |     |     |     |     |     |     |
| <i>tob2</i>   | 346  | 14.1              | NM_016272      | Transducer of ERBB2, 2                                |        |     |     | x   |     |     | x   |
| <i>wasl</i>   | 130  | 13.2              | NM_003941      | Wiskott-Aldrich syndrome-like                         |        |     |     | x   |     |     | x   |
| <i>papola</i> | 250  | 8.9               | NM_032632      | Poly(A) polymerase alpha                              |        |     | x   |     | x   |     |     |
| <i>cnot4</i>  | 120  | 5.4               | NM_001190847   | CCR4-NOT transcription complex, subunit 4             |        |     |     |     |     |     | x   |
| <i>ube2d1</i> | 356  | 5.1               | NM_001204880   | Ubiquitin-conjugating enzyme E2D 1                    |        |     |     |     |     | x   |     |
| <i>rbpms2</i> | 218  | 3.9               | NM_194272      | RNA-binding protein with multiple splicing 2 (Hermes) |        |     |     | x   |     |     | x   |

Vegetally localized mRNA targets are shown with their corresponding non-localized miRNA(s).

underscoring the vegetal pole as a major platform for cell signaling. (5) Well over 10% of the vegetal mRNAs encode components with known functions in neurogenic pathways, including the transmembrane ligand *Efnb1* and scaffold protein *Grip2*. We show that *efnb1* is required for proper PGC migration. (6) *sox7*, *otx1*, *e2f1*, *wnt1*, *rras2* and *parn* are also germ plasm components and required for normal PGC development.

#### Biological process and network analysis

MetaCore (GeneGo) analysis placed over 20% (47/198) of the known vegetal pole mRNAs within a direct interaction network that identified four major hubs centered around transcription factors *e2f1*, *irf8*, *err1* and the histone acetyltransferase *p300* (Fig. 2C). Although the network is built based on data from different systems, it reveals novel regulatory pathways and candidates that can be tested for their functions in embryogenesis. For example, it remains unknown what restricts

microtubule array formation to the vegetal pole during cortical rotation. Our RNA-seq analysis identified JNK (*mapk8*) and *slain1* as enriched at the vegetal pole and both have been implicated in microtubule dynamics (GeneCards).

*e2f1* constitutes the largest hub by far, connecting 19 other localized mRNAs, including two additional hubs, *err1* and *p300*, and genes involved in cell cycle regulation, DNA replication, pluripotency/differentiation, and metabolism (Fig. 2C). Overexpression of *e2f1* resulted in a loss of PGCs (Fig. 4). This effect might be due to misregulation of the cell cycle and/or in initiating somatic differentiation. Consistent with this hypothesis, Zaragoza et al. (2010) showed that the balance of E2f transcription factors, E2f dimerization partners and C/EBP $\alpha$  is critical for proper cell cycle progression. E2f1 has also been shown to mediate proliferation through Wnt signaling by direct interaction with the *Fzd1* promoter (Yu et al., 2013). Furthermore, E2f1 activates *Pcsk6*, which allows for mesoderm induction by activation of *Veg1*

**Table 4. Gene function of the 15 most highly enriched mRNAs identified at the oocyte animal pole**

| Gene ID         | Gene name                                                            | v7.1 JGI          | Unigene  | Ratio (A/V) | Protein function or functional feature                                          |
|-----------------|----------------------------------------------------------------------|-------------------|----------|-------------|---------------------------------------------------------------------------------|
| <i>ifrd2</i>    | Interferon-related developmental regulator 2                         | Xelaev16023388m.g | XI.75341 | 22.84       | Interferon-related protein PC4-like                                             |
| <i>slc18a2</i>  | Solute carrier family 18 (vesicular monoamine transporter), member 2 | Xelaev16012438m.g | XI.13611 | 17.73       | Transmembrane solute exchange of neurotransmitters                              |
| <i>spata13*</i> | Spermatogenesis associated 13                                        | Xelaev16016628m.g | XI.58825 | 16.42       | Invasion-inducing protein TIAM1/CDC24 and related RhoGEF GTPases                |
| <i>adpgk</i>    | ADP-dependent glucokinase                                            | Xelaev16007044m.g | NA       | 15.43       | Catalyzes glucose to glucose-6-phosphate via ADP                                |
| <i>c7orf43*</i> | Chromosome 7 open reading frame 43                                   | Xelaev16021226m.g | XI.56042 | 15.20       | Uncharacterized conserved protein                                               |
| <i>prrg4</i>    | Proline-rich Gla (G-carboxyglutamic acid) 4 (transmembrane)          | Xelaev16039880m.g | XI.4519  | 14.75       | Cytosolic, calcium ion binding protein                                          |
| <i>acaca</i>    | Acetyl-CoA carboxylase alpha                                         | Xelaev16038229m.g | NA       | 12.36       | Acetyl-CoA carboxylase                                                          |
| <i>pou2f1</i>   | POU class 2 homeobox 1                                               | Xelaev16026767m.g | XI.1265  | 12.28       | Oct1 transcription factor                                                       |
| <i>prkag1*</i>  | Protein kinase, AMP-activated, gamma 2 non-catalytic subunit of AMPK | Xelaev16029267m.g | XI.34576 | 12.00       | AMPK helps modulate cellular energy metabolism                                  |
| <i>xkrx</i>     | XK, Kell blood group complex subunit-related, X-linked               | Xelaev16047837m.g | NA       | 11.72       | Uncharacterized conserved protein                                               |
| <i>tmem192</i>  | Transmembrane protein 192                                            | Xelaev16056645m.g | XI.19528 | 11.71       | Uncharacterized conserved protein                                               |
| <i>ssr1*</i>    | Signal sequence receptor, alpha                                      | Xelaev16076712m.g | XI.60983 | 11.48       | Glycosylated endoplasmic reticulum receptor that mediates protein translocation |
| <i>prr11*</i>   | Proline-rich 11                                                      | Xelaev16035856m.g | NA       | 11.10       | Rac1 GTPase effector FRL; cell cycle                                            |
| <i>dand5</i>    | DAN domain family member 5, BMP antagonist                           | Xelaev16057997m.g | XI.51884 | 11.04       | Maternal BMP/TGF $\beta$ /Wnt inhibitor                                         |
| <i>rmdn3*</i>   | Regulator of microtubule dynamics 3                                  | Xelaev16028196m.g | XI.9583  | 10.15       | Nuclear localization sequence binding; cellular calcium regulation              |

GeneCards was used to indicate gene functions. \*Six novel mRNAs enriched at the animal pole are indicated.



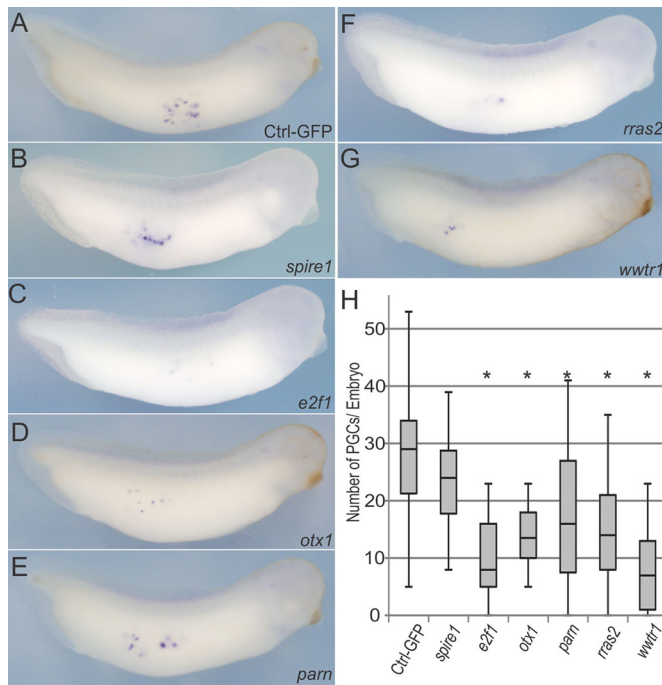

**Fig. 4. Overexpression of five out of six selected vegetally enriched mRNAs reduces PGC number.** One-cell embryos were injected in the vegetal region with GFP (control) or the indicated transcripts (0.5 ng). Tailbud embryos (stage 32-35) were analyzed for *xpat* expression by WISH, and representative images are shown (A-G). The number of PGCs per embryo was quantified (H). GFP,  $n=16$ ; *spire1*,  $n=39$ ; *e2f1*,  $n=64$ ; *otx1*,  $n=27$ ; *parrn*,  $n=35$ ; *rras2*,  $n=48$ ; *wwtr1*,  $n=35$ . \* $P<0.05$ , compared with GFP control. Analysis based on at least two independent experiments and shown as a box and whisker plot.

(Heasman, 2006). *E2f1* also activates *Cbx7*, a member of the Polycomb repressor PRC1-like complex that plays a pivotal role in the transition from pluripotency to differentiation by regulating *Cbx8* and *Fzd1* (Klauke et al., 2013; Creppe et al., 2014; Mani et al., 2008; O’Loughlen et al., 2015). Thus, *E2f1* in excess may tip the balance towards somatic differentiation in PGCs, causing their loss. Because of the dominant position that *e2f1* holds, we attempted to

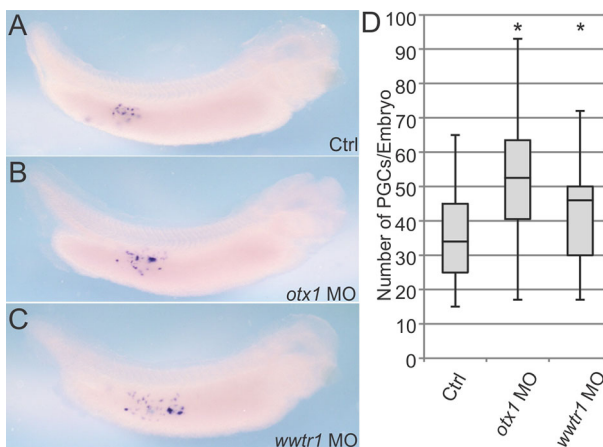

**Fig. 5. MO-mediated knockdown of a subset of vegetally enriched mRNAs increases PGC number.** One-cell embryos were injected in the vegetal region with MOs (15 ng) targeting *otx1* or *wwtr1*. Tailbud embryos (stage 32-35) were analyzed for *xpat* expression by WISH. Representative images are shown (A-C). The number of PGCs per embryo was quantified (D). Uninjected control (ctrl),  $n=32$ ; *otx1*-MO,  $n=31$ ; *wwtr1*-MO,  $n=25$ . \* $P<0.05$  compared with control. Analysis based on at least two independent experiments.

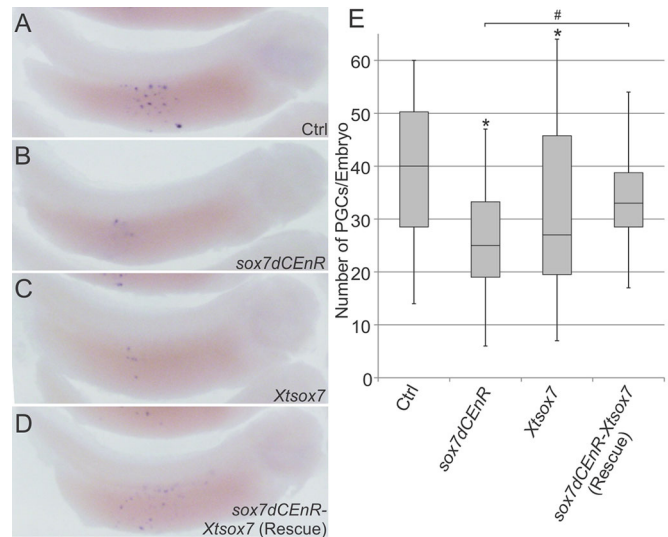

**Fig. 6. Altering *sox7* expression reduces PGC number.** One-cell embryos were injected in the vegetal region with *sox7dCENR* RNA (200 pg) and *Xtsox7* RNA (200 pg), alone and in combination. Tailbud embryos were analyzed for *xpat* expression by WISH. Representative images are shown (A-D). The number of PGCs per embryo was quantified (E). Uninjected control (ctrl),  $n=28$ ; *sox7dCENR*,  $n=24$ ; *Xtsox7*,  $n=27$ ; *sox7dCENR* and *Xtsox7*,  $n=28$ . \* $P<0.05$  compared with uninjected control. # $P<0.05$  compared with *sox7dCENR*. Analysis based on at least two independent experiments.

knockdown its activity by antisense MO injection into fertilized eggs (data not shown). Unfortunately, we could not detect a phenotype, most likely because of a pre-existing maternal supply of *E2f1* protein (Peshkin et al., 2015). Future oocyte host transfer studies will investigate the function of *E2f1* by depleting the maternal supply.

Interestingly, overexpression of *rras2*, *parrn*, *otx1* and *wwtr1* also resulted in PGC loss, while MO-mediated inhibition of *otx1* and *wwtr1* caused an increase in PGC number. Previous studies involving these transcripts all mention their possible roles in cell cycle regulation, proliferation and/or survival, consistent with our observations. The deadenylase *Parrn* mediates progression through G0/G1 by regulating *p53* and *p21* expression (Zhang and Yan, 2015). *Rras2* has been implicated in cell proliferation by regulating the PI3K (Murphy et al., 2002) and ERK pathways (Larive et al., 2012). Similarly, *Otx1* regulates proliferation through the ERK/MAPK pathway, and is necessary for progression through S phase (Li et al., 2016). *Wwtr1* (*Taz*) is involved in cell cycle progression, proliferation and survival by regulating cyclin A and *Ctgf* expression and *Casp3* activity (Wang et al., 2014). Taken together, our working hypothesis is that overexpression results in cell cycle checkpoint abnormalities and cell death, whereas loss of function releases the restrained PGC cell cycle clock resulting in more PGCs. Further investigation of these known downstream targets of *rras2*, *parrn*, *otx1* and *wwtr1* in PGCs is necessary to deduce the exact mechanisms by which these genes regulate PGC number.

### **Sox7 is required for PGC development**

Here we show a novel role for *sox7* in PGC development. *sox7* is expressed in germ plasma, and its expression persists in PGCs after segregation from the endoderm lineage (Fig. 3B). Both knockdown and overexpression of *sox7* in the fertilized embryo caused a significant decrease in the number of PGCs at the tailbud stage (Fig. 6, Fig. S3). These results strongly suggest that the level and

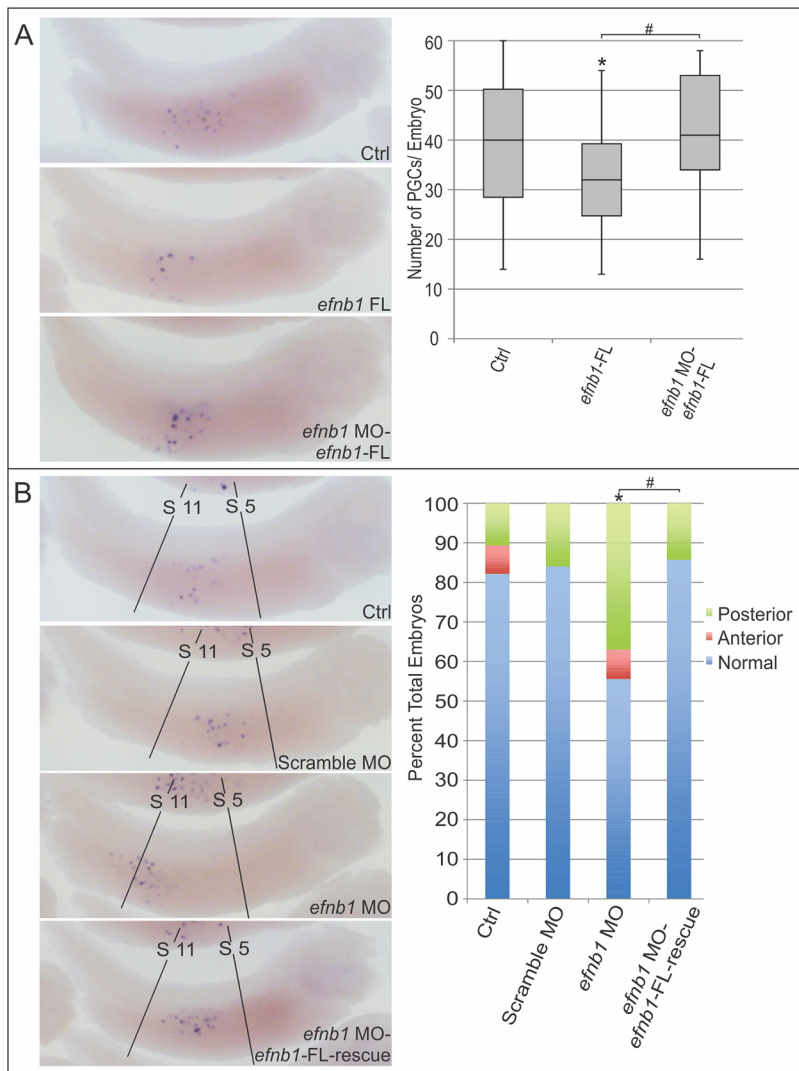

**Fig. 7. *efnb1* is required for normal PGC number and migration.** One-cell embryos were injected in the vegetal region with (A) *efnb1*-FL alone (200 pg), or *efnb1*-FL (200 pg) and *efnb1*-MO (16 ng); (B) scrambled-MO (16 ng), *efnb1*-MO alone (16 ng), or *efnb1*-MO (16 ng) and *efnb1*-FL-rescue (200 pg). Tailbud embryos were analyzed for *xpat* expression by WISH. Representative images are shown on the left. (A) The number of PGCs per embryo was quantified. (B) Percentage of embryos with mislocalized PGCs was calculated. Black lines indicate the boundaries of normal PGC location, between somites 5 and 11. Uninjected control (Ctrl),  $n=28$ ; *efnb1*-FL,  $n=28$ ; *efnb1*-FL and *efnb1*-MO,  $n=28$ ; scrambled-MO,  $n=25$ ; *efnb1*-MO,  $n=27$ ; *efnb1*-MO and *efnb1*-FL-rescue,  $n=28$ . \* $P<0.05$  compared with uninjected control. # $P<0.05$  compared with *efnb1*-FL (A) or *efnb1*-MO (B). Analysis based on at least two independent experiments.

temporal regulation of *sox7* activity in PGCs are crucial to their normal development, most likely by activating the proper gene networks in the germline.

*sox7* directly activates genes necessary for endoderm differentiation, including the nodal-related protein-encoding genes, and induces the expression of *endodermin* and *mixer* (Zhang et al., 2005a). Thus, overexpression of *sox7* in PGCs may cause ectopic expression of these endodermal differentiation genes, resulting in apoptosis of PGCs and ultimately a reduction in their number. Additionally, the Wnt/ $\beta$ -catenin signaling pathway has been reported to promote stem cell self-renewal and cell survival (reviewed by Mohammed et al., 2016), two characteristics necessary to preserve the germline. *Xlsox7* harbors the  $\beta$ -catenin-binding motif DRNEFDQYL (Guo et al., 2008), suggesting that *sox7* inhibition might cause reduced PGC number by influencing gene expression downstream of Wnt signaling.

Irie et al. (2015) have recently identified the F-type Sox family member *SOX17* as the primary regulator of human PGC-like fate. Interestingly, similar to the *Xenopus* F-type family member *sox7* (Zhang et al., 2005b), human *SOX17* has historically been reported as crucial for endoderm specification. F-type Sox genes regulate the expression of germline-specific genes, such as those of the Nanos family or *DND1*, and pluripotent genes such as *OCT4* (*POU5F1*) and *NANOG* (Irie et al., 2015). These recent findings, along with

our observations, have led us to hypothesize that *Sox7* is a key transcription factor necessary to specify PGCs in *Xenopus*. Future studies are necessary to establish when *sox7* is translated and whether it partners with another transcription factor(s) in PGCs to activate germline-specific gene expression programs.

#### ***Efnb1* is required for normal PGC development and migration**

Our functional studies reveal a novel role for *efnb1* in PGC maintenance and migration (Fig. 7). *efnb1* is expressed in BBs, suggesting that it is an early component of germ plasm. After MBT, PGC-specific *efnb1* expression is lost but it is re-expressed at neurula (Fig. 2A). These observations suggested that *efnb1* might function in both the endoderm and germline lineages. MO-mediated knockdown of *efnb1* did not affect PGC number, but caused PGCs to migrate outside their normal boundaries, primarily into posterior endoderm. By contrast, *efnb1* overexpression decreased the number of PGCs but did not affect migration and development. These results suggest that *efnb1* is also involved in signaling pathways necessary for normal PGC development. Both the mismigration and loss of PGCs could be rescued, indicating specificity of the observed phenotypes (Fig. 7).

Ephrin ligands and Eph receptors are known to contribute to the maintenance of vertebrate tissue boundaries (Rohani et al., 2014), to regulate axon migration (Klein and Kania, 2014) and establish A/P

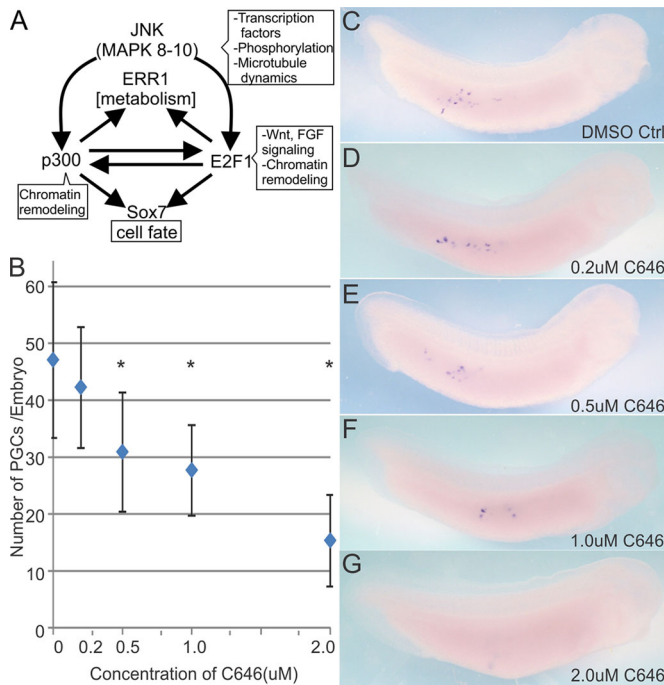

**Fig. 8. Inhibition of p300 reduces PGC number.** (A) Schematic of GeneGo-predicted p300 regulatory interconnections from our data set. (B-G) One-cell embryos were incubated with  $\leq 0.04\%$  DMSO (ctrl,  $n=31$ ) or increasing concentrations of the p300 inhibitor C646: 0.2  $\mu\text{M}$ ,  $n=38$ ; 0.5  $\mu\text{M}$ ,  $n=34$ ; 1  $\mu\text{M}$ ,  $n=34$ ; 2  $\mu\text{M}$ ,  $n=34$ . Tailbud embryos were analyzed for *xpat* expression by WISH. The average number of PGCs per embryo was quantified (B). \* $P < 0.05$  compared with uninjected control.

gradients required for proper cell migration (Bush and Soriano, 2010). Therefore, *efnb1* knockdown-mediated PGC mismigration may be due to disruption of the A/P axis. Consistent with this interpretation, PGCs were not ectopically found outside of the endoderm nor was PGC number affected. Interestingly, *Enfb1* associates directly with Dishevelled and is capable of recruiting it and Grip2 to the plasma membrane (Brückner et al., 1999; Moore et al., 2004; Lee et al., 2006). Grip2 encodes a scaffolding protein known to interact with receptors including Frizzled1 (Korkut et al., 2009; Ataman et al., 2006). Knockdown of Grip2 in the embryo disturbs normal PGC migration (Kirilenko et al., 2008; Tarbashevich et al., 2007), similar to our results with *efnb1* (Fig. 7). Taken together, these observations suggest a close physical association between Grip2, *Efnb1* and the Wnt signaling components that facilitates correct PGC migration.

Unlike somatic cells, PGCs are known to divide symmetrically only two or three times before exiting the endoderm (Whittington and Dixon, 1975). Disruption of the cell cycle or inappropriate gene expression in PGCs would trigger their cell death (Lai et al., 2012). *efnb1* interacts with at least two signaling pathways: FGF (Moore et al., 2004; Lee et al., 2006) and Wnt (Lien and Fuchs, 2014; Lee et al., 2006). Disruption of these pathways could affect cell proliferation or differentiation, which might explain the effect on PGC number when *efnb1* is overexpressed.

### Inhibition of p300 results in a loss of PGCs

Here we show for the first time that p300 is necessary for proper PGC development (Fig. 8). Pharmaceutical inhibition of p300 caused a significant reduction in PGC number, suggesting a role in proliferation, apoptosis and/or cell cycle regulation. Similar to what has been shown in retinal cells, p300 may promote PGC

proliferation and protect PGCs from apoptosis by modulating the activity of Stat1 and Stat3 (Kawase et al., 2016). Alternatively, p300 might be necessary to allow PGCs to pass through G1 of the cell cycle in order to proliferate, consistent with its role in leukemia cells (Gao et al., 2013). Further investigation is necessary to determine the precise molecular mechanisms by which p300 regulates PGC number.

Our RNA-seq analysis has revealed interconnected pathways highlighting the vegetal pole as a major signaling center. Interestingly, *grip2*, which encodes an important scaffolding protein in the nervous system, was the most abundant vegetal mRNA identified in our analysis. Grip2 is likely to represent a key scaffolding protein for the assembly, through its PDZ domains, of multi-protein signaling complexes. The challenge now is to functionally test the pathways revealed by our comprehensive list of localized mRNAs and to define the maternal contributions to both germline and somatic cell fates.

## MATERIALS AND METHODS

### Isolation of animal and vegetal pole samples

*X. laevis* adult frogs were purchased from *Xenopus* Express. Ovarian tissue was surgically removed from anesthetized females, then oocytes were enzymatically released from ovarian tissue (Sive et al., 2000) and stage VI oocytes were selected. Oocyte-matched vegetal and animal poles (10-20% of total oocyte for each pole) were cut with a razor blade (Cuykendall and Houston, 2010) (for further details, see the supplementary Materials and Methods). Prior to collection, the germinal vesicle (GV) was manually removed from animal pole samples to ensure that GV retention of transcripts with different final locations would not contribute to false positives in our RNA-seq analysis. RNA was extracted (see the supplementary Materials and Methods) and 25 vegetal and animal oocyte-paired poles were collected per frog. Equal concentrations of RNA from the respective poles of oocytes from three different frogs were combined to make one vegetal and one animal pole paired sample. Oocytes from a total of nine frogs were used to form three vegetal and three animal pole samples that were submitted for RNA-seq analysis. All animal protocols were approved by the Institutional Animal Care and Use Committee of the University of Miami.

### RNA preparation for Illumina sequencing

For each sample, 1  $\mu\text{g}$  of total RNA was processed for RNA quality with the Agilent Bioanalyzer 2100. Samples were processed for both RNA-seq and small (sm)RNA-seq. RNA-seq samples were depleted of mitochondrial and ribosomal RNAs with the ScriptSeq Complete Gold Kit (Illumina) and subjected to ten cycles of PCR prior to RNA sequencing on the Illumina HiSeq 2000 using the reagents provided in the Illumina TruSeq PE Cluster Kit v3 and the TruSeq SBS Kit-HS (200 cycle) kits. Reads aligning to a ribosome-specific reference or mitochondrial sequences represented  $<5\%$  and 1.28% of the total, respectively. For smRNA-seq, samples underwent 11 cycles of PCR and were then prepped using the Illumina TruSeq Small RNA Sample Preparation Guide (15004197 Rev. D). Cluster generation was performed on the Illumina cBot according to the manufacturer's recommendations. An average of 10.1 million (animal) and 19.4 million (vegetal) pass-filter paired-end 100 base reads were generated per sample (range: 9.0-11.2 million, animal; 17.8-22.7 million, vegetal).

### Data processing and quantification

Quality control metrics were determined using FastQC software (Babraham Bioinformatics). The total library size was 2.8 Gb, with 95% of the total base pairs above internal FastQC thresholds. Variance between samples was minimal with sample reads ranging from 24.6-26.8 and 21.2-21.5 million read pairs for animal and vegetal pole samples, respectively. Raw reads were aligned using TopHat v2 RNA-seq analysis software. To assess the quality of the reference genome, reads were aligned to both *X. laevis* (v6.0 and v7.1) and *X. tropicalis* (v7.1) references. Alignment to the *X. laevis* genome

ranged from 66.42%-71.45% and the *X. tropicalis* genome ranged from 25.21%-39.27%. Therefore, reads from the *X. laevis* genome alignment were quantified.

Transcripts were quantified using Cufflinks v2.1. At least 21,555 transcripts were detected in each sample, and of those 13,930 had a fragments per kilobase of transcript per million mapped reads (FPKM) value  $\geq 5$ . Differential expression analysis was performed using Cuffdiff to compare vegetal versus animal pole transcripts with an FPKM value  $\geq 5$  (Mortazavi et al., 2008). 5717 total transcripts (FDR $<0.05$ , fold change  $\geq 1.95$ ) were differentially expressed. More stringent criteria were then employed to determine transcripts enriched in the vegetal or animal pole. The bulk of large yolk platelets are within the vegetal hemisphere, reducing the yolk-free cytoplasm content there (Danilchik and Gerhart, 1987; Callen et al., 1980; Rebagliati et al., 1985); therefore, we set a criterion of 4-fold enrichment for vegetal versus animal pole transcripts. An inherent bias exists towards the animal pole based on the 4-fold difference in RNA concentrations along this axis; thus, transcripts enriched 10-fold in the animal pole compared with the vegetal pole were considered localized to the animal pole.

### Small RNA analysis and novel non-coding RNA identification

For small RNA analysis, reads were aligned to a *X. laevis*-specific miRNA reference and then counted. *X. tropicalis* homologs of *X. laevis* miRNAs were queried for miRNA targets. To identify novel long non-coding (lnc) RNAs, Trinity software (Trinity version 2012-06-08) was used for *de novo* assembly of the transcripts in each sample. For details, see the supplementary Materials and Methods.

### Gene name identification and GO analysis

Joint Genome Institute (JGI) annotation was used for gene name identification (Xenbase.org). To verify gene identity, separate BLAST alignments (NCBI) for the scaffolds were also performed. Genes homologous to those of humans were submitted to GeneCards for summary information (genecards.org). GeneGo software (MetaCore MetaCore Bioinformatics software from Thomson Reuters, <https://portal.genego.com/>) was used for pathway analysis. For further details, see the supplementary Materials and Methods.

### Whole-mount *in situ* hybridization (WISH)

*X. laevis* embryos were obtained as described by Sive et al. (2000) and WISH was performed as described in the supplementary Materials and Methods.

### Functional analyses

mRNAs of select genes were transcribed from respective cDNA clones and 0.5 ng injected into fertilized embryos. Tailbud stage embryos were then analyzed for PGC number and location using WISH for the germ plasm marker *xpat*. *X. laevis* *otx1*, *wwtr1*, *efnb1* and *sox7* expression were inhibited by MO and/or by overexpressing a dominant-negative construct (*sox7*). *X. laevis* p300 expression was pharmacologically inhibited in fertilized embryos by incubation with the small molecule inhibitor C646. Tailbud-stage embryos were then analyzed for proper PGC number and location using WISH. *P*-values were determined using a two-tailed unpaired Student's *t*-test. *P* $<0.05$  was considered significant. For further details, see the supplementary Materials and Methods.

### Acknowledgements

We thank Drs Jing Yang for the *X. tropicalis* plasmids for *hook2*, *tab2* and *sox7* and Mike Klymkowsky for the *X. laevis* *sox7* dominant-negative construct. Drs Michael Gilchrist through the Bioinformatics Workshop (Cold Spring Harbor, NY) and Lingyu Wang provided excellent technical support for our RNA-seq analysis.

### Competing interests

The authors declare no competing or financial interests.

### Author contributions

D.A.O.: Performed experiments, data analysis, figure preparation, helped write manuscript. A.M.B.: Planned experiments, performed functional experiments, data analysis, helped write manuscript. T.H.A.: Functional experiments, figure

preparation, data analysis. K.M.N.: Data preparation and analysis. D.V.B.: Bioinformatics and analysis of RNA-seq data. M.L.K.: Conceived and planned experiments, wrote manuscript.

### Funding

This work was supported by the National Institutes of Health (HD072340, GM102397 to M.L.K.). Deposited in PMC for release after 12 months.

### Data availability

All RNA-seq data are available at Gene Expression Omnibus with accession number GSE80971.

### Supplementary information

Supplementary information available online at <http://dev.biologists.org/lookup/doi/10.1242/dev.139220.supplemental>

### References

- Agüero, T., Kassmer, S., Alberio, R., Johnson, A. and King, M. L. (2016). Mechanism of vertebrate germ cell determination. In *Vertebrate Development: Maternal to Zygotic Control* (ed. F. Pelegri, M. Danilchik and A. Sutherland), pp. 383-440. Berlin: Springer.
- Ataman, B., Ashley, J., Górczyca, D., Górczyca, M., Mathew, D., Wichmann, C., Sigrist, S. J. and Budnik, V. (2006). Nuclear trafficking of Drosophila Frizzled-2 during synapse development requires the PDZ protein dGRIP. *Proc. Natl. Acad. Sci. USA* **103**, 7841-7846.
- Bartel, D. P. (2004). MicroRNAs: genomics, biogenesis, mechanism, and function. *Cell* **116**, 281-297.
- Bates, T. J. D., Vonica, A., Heasman, J., Brivanlou, A. H. and Bell, E. (2013). Coco regulates dorsoventral specification of germ layers via inhibition of TGF $\beta$  signalling. *Development* **140**, 4177-4181.
- Boussouar, F., Goudarzi, A., Buchou, T., Shiota, H., Barral, S., Debernardi, A., Guardiola, P., Brindle, P., Martinez, G., Arnoult, C. et al. (2014). A specific CBP/p300-dependent gene expression programme drives the metabolic remodelling in late stages of spermatogenesis. *Andrology* **2**, 351-359.
- Bovolenta, P., Rodriguez, J. and Esteve, P. (2006). Frizzled/Ryk mediated signalling in axon guidance. *Development* **133**, 4399-4408.
- Brückner, K., Pablo Labrador, J., Scheiffele, P., Herb, A., Seeburg, P. H. and Klein, R. (1999). EphrinB ligands recruit GRIP family PDZ adaptor proteins into raft membrane microdomains. *Neuron* **22**, 511-524.
- Bush, J. O. and Soriano, P. (2010). Ephrin-B1 forward signaling regulates craniofacial morphogenesis by controlling cell proliferation across Eph-ephrin boundaries. *Genes Dev.* **24**, 2068-2080.
- Callen, J. C., Dennebouy, N. and Mounolou, J. C. (1980). Development of the mitochondrial mass and accumulation of mtDNA in previtellogenic stages of *Xenopus laevis* oocytes. *J. Cell Sci.* **41**, 307-320.
- Claussen, M., Lingner, T., Pommerenke, C., Opitz, L., Salinas, G. and Pieler, T. (2015). Global analysis of asymmetric RNA enrichment in oocytes reveals low conservation between closely related *Xenopus* species. *Mol. Biol. Cell* **26**, 3777-3787.
- Colozza, G. and De Robertis, E. M. (2014). Maternal syntabulin is required for dorsal axis formation and is a germ plasm component in *Xenopus*. *Differentiation* **88**, 17-26.
- Costa, C., Santos, M., Martínez-Fernández, M., Dueñas, M., Lorz, C., García-Escudero, R. and Paramio, J. M. (2013). E2F1 loss induces spontaneous tumour development in Rb-deficient epidermis. *Oncogene* **32**, 2937-2951.
- Creppe, C., Palau, A., Malinverni, R., Valero, V. and Buschbeck, M. (2014). A Cbx8-containing polycomb complex facilitates the transition to gene activation during ES cell differentiation. *PLoS Genet.* **10**, e1004851.
- Cuykendall, T. N. and Houston, D. W. (2010). Identification of germ plasm-associated transcripts by microarray analysis of *Xenopus* vegetal cortex RNA. *Dev. Dyn.* **239**, 1838-1848.
- Danilchik, M. V. and Gerhart, J. C. (1987). Differentiation of the animal-vegetal axis in *Xenopus laevis* oocytes: I. Polarized intracellular translocation of platelets establishes the yolk gradient. *Dev. Biol.* **122**, 101-112.
- De Domenico, E., Owens, N. D. L., Grant, I. M., Gomes-Faria, R. and Gilchrist, M. J. (2015). Molecular asymmetry in the 8-cell stage *Xenopus tropicalis* embryo described by single blastomere transcript sequencing. *Dev. Biol.* **408**, 252-268.
- Eimon, P. M. and Harland, R. M. (2001). *Xenopus* Dan, a member of the Dan gene family of BMP antagonists, is expressed in derivatives of the cranial and trunk neural crest. *Mech. Dev.* **107**, 187-189.
- Gao, X.-N., Lin, J., Ning, Q.-Y., Gao, L., Yao, Y.-S., Zhou, J.-H., Li, Y.-H., Wang, L.-L. and Yu, L. (2013). A histone acetyltransferase p300 inhibitor C646 induces cell cycle arrest and apoptosis selectively in AML1-ETO-positive AML cells. *PLoS ONE* **8**, e55481.
- Grabherr, M. G., Haas, B. J., Yassour, M., Levin, J. Z., Thompson, D. A., Amit, I., Adiconis, X., Fan, L., Raychowdhury, R. et al. (2011). Full-length transcriptome assembly from RNA-seq data without a reference genome. *Nat. Biotechnol.* **29**, 644-652.

- Grant, P. A., Yan, B., Johnson, M. A., Johnson, D. L. E. and Moody, S. A. (2014). Novel animal pole-enriched maternal mRNAs are preferentially expressed in neural ectoderm. *Dev. Dyn.* **243**, 478-496.
- Guo, L., Zhong, D., Lau, S., Liu, X., Dong, X.-Y., Sun, X., Yang, V. W., Vertino, P. M., Moreno, C. S., Varma, V. et al. (2008). Sox7 is an independent checkpoint for beta-catenin function in prostate and colon epithelial cells. *Mol. Cancer Res.* **6**, 1421-1430.
- Heasman, J. (2006). Maternal determinants of embryonic cell fate. *Semin. Cell Dev. Biol.* **17**, 93-98.
- Houston, D. W. (2013). Regulation of cell polarity and RNA localization in vertebrate oocytes. *Int. Rev. Cell Mol. Biol.* **306**, 127-185.
- Hudson, C. and Woodland, H. R. (1998). Xpat, a gene expressed specifically in germ plasm and primordial germ cells of *Xenopus laevis*. *Mech. Dev.* **73**, 159-168.
- Irie, N., Weinberger, L., Tang, W. W. C., Kobayashi, T., Viukov, S., Manor, Y. S., Dietmann, S., Hanna, J. H. and Surani, M. A. (2015). SOX17 is a critical specifier of human primordial germ cell fate. *Cell* **160**, 253-268.
- Johansen, A. K. Z., Dean, A., Morecroft, I., Hood, K., Nilsen, M., Loughlin, L., Anagnostopoulou, A., Touyz, R. M., White, K. and MacLean, M. R. (2016). The serotonin transporter promotes a pathological estrogen metabolic pathway in pulmonary hypertension via cytochrome P450 1B1. *Pulm. Circ.* **6**, 82-92.
- Karpinka, J. B., Fortriede, J. D., Burns, K. A., James-Zorn, C., Ponferrada, V. G., Lee, J., Karimi, K., Zorn, A. M. and Vize, P. D. (2015). Xenbase, the *Xenopus* model organism database: new virtualized system, data types and genomes. *Nucleic Acids Res.* **43**, D756-D763.
- Kawase, R., Nishimura, Y., Ashikawa, Y., Sasagawa, S., Murakami, S., Yuge, M., Okabe, S., Kawaguchi, K., Yamamoto, H., Moriyuki, K. et al. (2016). EP300 protects from light-induced retinopathy in zebrafish. *Front. Pharmacol.* **7**, 126.
- King, M. L. (2014). Germ cell specification in *Xenopus*. In *Xenopus Development* (ed. M. Kloc and J. Z. Kubiak), pp. 75-100. Hoboken, New Jersey: John Wiley & Sons.
- King, M. L., Zhou, Y. and Bubunenko, M. (1999). Polarizing genetic information in the egg: RNA localization in the frog oocyte. *BioEssays* **21**, 546-557.
- Kirilenko, P., Weierud, F. K., Zorn, A. M. and Woodland, H. R. (2008). The efficiency of *Xenopus* primordial germ cell migration depends on the germplasm mRNA encoding the PDZ domain protein Grip2. *Differentiation* **76**, 392-403.
- Klauke, K., Radulović, V., Broekhuis, M., Weersing, E., Zwart, E., Olthof, S., Ritsema, M., Bruggeman, S., Wu, X., Helin, K. et al. (2013). Polycomb Cbx family members mediate the balance between haematopoietic stem cell self-renewal and differentiation. *Nat. Cell Biol.* **15**, 353-362.
- Klein, R. and Kania, A. (2014). Ephrin signalling in the developing nervous system. *Curr. Opin. Neurobiol.* **27**, 16-24.
- Korkut, C., Ataman, B., Ramachandran, P., Ashley, J., Barria, R., Gherbesi, N. and Budnik, V. (2009). Trans-synaptic transmission of vesicular Wnt signals through Evi/Wntless. *Cell* **139**, 393-404.
- Kwok, R. P. S., Liu, X.-T. and Smith, G. D. (2006). Distribution of co-activators CBP and p300 during mouse oocyte and embryo development. *Mol. Reprod. Dev.* **73**, 885-894.
- Lai, F. and King, M. L. (2013). Repressive translational control in germ cells. *Mol. Reprod. Dev.* **80**, 665-676.
- Lai, F., Singh, A. and King, M. L. (2012). *Xenopus* Nanos1 is required to prevent endoderm gene expression and apoptosis in primordial germ cells. *Development* **139**, 1476-1486.
- Larive, R. M., Abad, A., Cardaba, C. M., Hernandez, T., Canamero, M., de Alava, E., Santos, E., Alarcon, B. and Bustelo, X. R. (2012). The Ras-like protein R-Ras2/TC21 is important for proper mammary gland development. *Mol. Biol. Cell* **23**, 2373-2387.
- Lee, H.-S., Bong, Y.-S., Moore, K. B., Soria, K., Moody, S. A. and Daar, I. O. (2006). Dishevelled mediates ephrinB1 signalling in the eye field through the planar cell polarity pathway. *Nat. Cell Biol.* **8**, 55-63.
- Li, H., Miao, Q., Xu, C.-W., Huang, J.-H., Zhou, Y.-F. and Wu, M.-J. (2016). OTX1 contributes to hepatocellular carcinoma progression by regulation of ERK/MAPK pathway. *J. Korean Med. Sci.* **31**, 1215-1223.
- Lien, W.-H. and Fuchs, E. (2014). Wnt some lose some: transcriptional governance of stem cells by Wnt/beta-catenin signaling. *Genes Dev.* **28**, 1517-1532.
- Mani, K. M., Lefebvre, C., Wang, K., Lim, W. K., Basso, K., Dalla-Favera, R. and Califano, A. (2008). A systems biology approach to prediction of oncogenes and molecular perturbation targets in B-cell lymphomas. *Mol. Syst. Biol.* **4**, 169.
- Minderman, H., Maguire, O., O'Loughlin, K. L., Muhitch, J., Wallace, P. K. and Abrams, S. I. (2016). Total cellular protein presence of the transcription factor IRF8 does not necessarily correlate with its nuclear presence. *Methods*, pii: S1046-2023(16)30266-3.
- Mohammed, M. K., Shao, C., Wang, J., Wei, Q., Wang, X., Collier, Z., Tang, S., Liu, H., Zhang, F., Huang, J. et al. (2016). Wnt/beta-catenin signaling plays an ever-expanding role in stem cell self-renewal, tumorigenesis and cancer chemoresistance. *Genes Dis.* **3**, 11-40.
- Moore, K. B., Mood, K., Daar, I. O. and Moody, S. A. (2004). Morphogenetic movements underlying eye field formation require interactions between the FGF and ephrinB1 signaling pathways. *Dev. Cell* **6**, 55-67.
- Mortazavi, A., Williams, B. A., McCue, K., Schaeffer, L. and Wold, B. (2008). Mapping and quantifying mammalian transcriptomes by RNA-Seq. *Nat. Methods* **5**, 621-628.
- Mowry, K. L. (1996). Complex formation between stage-specific oocyte factors and a *Xenopus* mRNA localization element. *Proc. Natl. Acad. Sci. USA* **93**, 14608-14613.
- Murphy, G. A., Graham, S. M., Morita, S., Reks, S. E., Rogers-Graham, K., Vojtek, A., Kelley, G. G. and Der, C. J. (2002). Involvement of phosphatidylinositol 3-kinase, but not RalGDS, in TC21/R-Ras2-mediated transformation. *J. Biol. Chem.* **277**, 9966-9975.
- Nikishin, D. A., Kremnyov, S. V., Konduktorova, V. V. and Shmukler, Y. B. (2012). Expression of serotonergic system components during early *Xenopus* embryogenesis. *Int. J. Dev. Biol.* **56**, 385-391.
- O'Loghlin, A., Martin, N., Krusche, B., Pemberton, H., Alonso, M. M., Chandler, H., Brookes, S., Parrinello, S., Peters, G. and Gil, J. (2015). The nuclear receptor NR2E1/TLX controls senescence. *Oncogene* **34**, 4069-4077.
- Peshkin, L., Wühr, M., Pearl, E., Haas, W., Freeman, R. M., Jr, Gerhart, J. C., Klein, A. M., Horb, M., Gygi, S. P. and Kirschner, M. W. (2015). On the relationship of protein and mRNA dynamics in vertebrate embryonic development. *Dev. Cell* **35**, 383-394.
- Rebagliati, M. R., Weeks, D. L., Harvey, R. P. and Melton, D. A. (1985). Identification and cloning of localized maternal RNAs from *Xenopus* eggs. *Cell* **42**, 769-777.
- Rinehart, J., Vazquez, N., Kahle, K. T., Hodson, C. A., Ring, A. M., Gulcicek, E. E., Louvi, A., Bobadilla, N. A., Gamba, G. and Lifton, R. P. (2011). WNK2 kinase is a novel regulator of essential neuronal cation-chloride cotransporters. *J. Biol. Chem.* **286**, 30171-30180.
- Rohani, N., Parmeggiani, A., Winklbauer, R. and Fagotto, F. (2014). Variable combinations of specific ephrin ligand/Eph receptor pairs control embryonic tissue separation. *PLoS Biol.* **12**, e1001955.
- Sive, H. L., Grainger, R. M. and Harland, R. M. (2000). *Early Development of Xenopus Laevis: A Laboratory Manual*. Cold Spring Harbor, NY: CSHL Press.
- Stovall, D. B., Cao, P. and Sui, G. (2014). SOX7: from a developmental regulator to an emerging tumor suppressor. *Histol. Histopathol.* **29**, 439-445.
- Tarbashevich, K., Koebnick, K. and Pieler, T. (2007). XGRIP2.1 is encoded by a vegetally localizing, maternal mRNA and functions in germ cell development and anteroposterior PGC positioning in *Xenopus laevis*. *Dev. Biol.* **311**, 554-565.
- Tarbashevich, K., Dzemantsei, A. and Pieler, T. (2011). A novel function for KIF13B in germ cell migration. *Dev. Biol.* **349**, 169-178.
- Venkatarama, T., Lai, F., Luo, X., Zhou, Y., Newman, K. and King, M. L. (2010). Repression of zygotic gene expression in the *Xenopus* germline. *Development* **137**, 651-660.
- Wang, L., Chen, Z., Wang, Y., Chang, D., Su, L., Guo, Y. and Liu, C. (2014). TR1 promotes cell proliferation and inhibits apoptosis through cyclin A and CTGF regulation in non-small cell lung cancer. *Tumour Biol.* **35**, 463-468.
- Whittington, P. M. and Dixon, K. E. (1975). Quantitative studies of germ plasm and germ cells during early embryogenesis of *Xenopus laevis*. *J. Embryol. Exp. Morphol.* **33**, 57-74.
- Yamaguchi, T., Kataoka, K., Watanabe, K. and Orii, H. (2014). Restriction of the *Xenopus* DEADSouth mRNA to the primordial germ cells is ensured by multiple mechanisms. *Mech. Dev.* **131**, 15-23.
- Yu, S., Yerges-Armstrong, L. M., Chu, Y., Zmuda, J. M. and Zhang, Y. (2013). E2F1 effects on osteoblast differentiation and mineralization are mediated through up-regulation of frizzled-1. *Bone* **56**, 234-241.
- Zaragoza, K., Begay, V., Schuetz, A., Heinemann, U. and Leutz, A. (2010). Repression of transcriptional activity of C/EBPalpha by E2F-dimerization partner complexes. *Mol. Cell. Biol.* **30**, 2293-2304.
- Zhang, L.-N. and Yan, Y.-B. (2015). Depletion of poly(A)-specific ribonuclease (PARN) inhibits proliferation of human gastric cancer cells by blocking cell cycle progression. *Biochim. Biophys. Acta* **1853**, 522-534.
- Zhang, C., Basta, T., Fawcett, S. R. and Klymkowsky, M. W. (2005a). SOX7 is an immediate-early target of VegT and regulates Nodal-related gene expression in *Xenopus*. *Dev. Biol.* **278**, 526-541.
- Zhang, C., Basta, T. and Klymkowsky, M. W. (2005b). SOX7 and SOX18 are essential for cardiogenesis in *Xenopus*. *Dev. Dyn.* **234**, 878-891.
- Zhang, Y.-F., Liu, L.-X., Cao, H.-T., Ou, L., Qu, J., Wang, Y. and Chen, J.-G. (2015). Otx1 promotes basal dendritic growth and regulates intrinsic electrophysiological and synaptic properties of layer V pyramidal neurons in mouse motor cortex. *Neuroscience* **285**, 139-154.
